# Supplementary material for: Implementation and Impact of an Antimicrobial Stewardship Post-Prescription Review Program: Challenges Amid Rising Resistance in a Tertiary Hospital
Source: Research Square preprint supplement (doi:10.21203/rs.3.rs-7236630/v1), 2026-01-16
Supplement: Supplementary file 1 [file c9c6b1bc17606bc4d9448527.docx]

**Supplemental Table S1 – Outcomes of proactive reviews**

|  | **Overall** | **Internal Medicine** | **General Surgery** | **Hematology** |
| --- | --- | --- | --- | --- |
| **Prescriptions, n (%)** | 210 | 64 (30.5) | 40 (19.0) | 106 (50.5) |
| **Patients, n (%)** | 180 | 62 (34.5) | 33 (18.3) | 85 (47.2) |
| **Reviews, n (%)** | 156 | 61 (39.1) | 39 (25.0) | 56 (35.9) |
| **Modified prescriptions, n (%)** | 53 | 24 (45.3) | 9 (17.0) | 20 (37.7) |
| **Outcomes** |  |  |  |  |
| **Empirical therapies** | **88 (56.4)** | **33 (54.1)** | **16 (41.0)** | **39 (69.6)** |
| Intensification (n), % | 2 (2.3) | 0 (0) | 0 (0) | 2 (5.1) |
| Semplification (n), % | 9 (10.2) | 5 (15.2) | 1 (6.3) | 3 (7.7) |
| Discontinuation (n), % | 8 (9.1) | 4 (12.1) | 1 (6.3) | 3 (7.7) |
| Continuation (n), % | 49 (55.7) | 15 (45.5) | 13 (81.3) | 21 (53.8) |
| Transition to targeted therapy (n), % | 20 (22.7) | 9 (27.3) | 1 (6.3) | 10 (25.6) |
| **Targeted therapies** | **68 (43.6)** | **28 (45.9)** | **23 (59.0)** | **17 (30.4)** |
| Intensification (n), % | 3 (4.4) | 0 (0) | 1 (4.3) | 2 (11.8) |
| Semplification (n), % | 6 (8.8) | 3 (10.7) | 3 (13.0) | 0 (0) |
| Discontinuation (n), % | 5 (7.4) | 3 (10.7) | 2 (8.7) | 0 (0) |
| Continuation (n), % | 54 (79.4) | 22 (78.6) | 17 (73.9) | 15 (88.2) |
| **Outcomes if inappropriate** | **87** | **30** | **23** | **34** |
| **Inappropriate empirical therapies** | **53 (60.9)** | **17 (56.7)** | **11 (47.8)** | **25 (73.5)** |
| Intensification (n), % | 0 (0) | 0 (0) | 0 (0) | 0 (0) |
| Semplification (n), % | 5 (9.4) | 1 (5.9) | 1 (9.1) | 3 (12.0) |
| Discontinuation (n), % | 4 (7.5) | 2 (11.8) | 1 (9.1) | 1 (4.0) |
| Continuation (n), % | 27 (50.9) | 8 (47.1) | 8 (72.7) | 11 (44.0) |
| Transition to targeted therapy (n), % | 17 (32.1) | 6 (35.3) | 1 (9.1) | 10 (40.0) |
| **Inappropriate targeted therapies** | **34 (39.1)** | **13 (43.3)** | **12 (52.2)** | **9 (26.5)** |
| Intensification (n), % | 3 (8.8) | 0 (0) | 1 (8.3) | 2 (22.2) |
| Semplification (n), % | 5 (14.7) | 2 (15.4) | 3 (25.0) | 0 (0) |
| Discontinuation (n), % | 3 (8.8) | 2 (15.4) | 1 (8.3) | 0 (0) |
| Continuation (n), % | 23 (67.6) | 9 (69.2) | 7 (58.3) | 7 (77.8) |
| **Outcomes if appropriate** | **69** | **31** | **16** | **22** |
| **Appropriate empirical therapies** | **35 (50.7)** | **16 (51.6)** | **5 (31.3)** | **14 (63.6)** |
| Intensification (n), % | 2 (5.7) | 0 (0) | 0 (0) | 2 (14.3) |
| Semplification (n), % | 4 (11.4) | 4 (25.0) | 0 (0) | 0 (0) |
| Discontinuation (n), % | 4 (11.4) | 2 (12.5) | 0 (0) | 2 (14.3) |
| Continuation (n), % | 22 (62.9) | 7 (43.8) | 5 (100.0) | 10 (71.4) |
| Transition to targeted therapy (n), % | 3 (8.6) | 3 (18.8) | 0 (0) | 0 (0) |
| **Appropriate targeted therapies** | **34 (49.3)** | **15 (48.4)** | **11 (68.8)** | **8 (36.4)** |
| Intensification (n), % | 0 (0) | 0 (0) | 0 (0) | 0 (0) |
| Semplification (n), % | 1 (2.9) | 1 (6.7) | 0 (0) | 0 (0) |
| Discontinuation (n), % | 2 (5.9) | 1 (6.7) | 1 (9.1) | 0 (0) |
| Continuation (n), % | 31 (91.2) | 13 (86.7) | 10 (90.9) | 8 (100.0) |

**Supplemental Table S2 – Characteristics of microbiological isolations during the study period in the departments analysed.**

|  | **Overall** | **Internal Medicine** | **General Surgery** | **Hematology** |
| --- | --- | --- | --- | --- |
| **At least one microbiological isolation, n (%)** | 127 | 44 (34,6) | 32 (25,2) | 51 (40,2) |
| **N. of microorganisms, n (%)** | 189 | 60 (31,8) | 61 (32,3) | 68 (35,9) |
| *S. aureus* | 4 (2.1) | 0 (0) | 4 (6.6) | 0 (0) |
| of which methicillin-resistant | 2 (50) | 0 (0) | 2 (50) | 0 (0) |
| Coagulase-negative staphylococci | 21 (11.1) | 3 (5) | 4 (6.6) | 14 (20.6) |
| of which methicillin-resistant | 17 (81) | 2 (66.7) | 3 (75.0) | 12 (87.5) |
| *Streptococcus spp.* | 2 (1.1) | 1 (1.7) | 0 (0) | 1 (1.5) |
| *E. faecalis* | 11 (5.8) | 5 (8.3) | 5 (8.2) | 1 (1.5) |
| of which VRE | 0 (0) | 0 (0) | 0 (0) | 0 (0) |
| *E. faecium* | 14 (7.4) | 1 (1.7) | 6 (9.8) | 7 (10.3) |
| of which VRE | 3 (21.4) | 0 (0) | 1 (16.7) | 2 (28.6) |
| Other Gram positive bacteria | 3 (1.6) | 2 (3.3) | 0 (0) | 1 (1.5) |
| *Enterobacterales* | 77 (40,7) | 30 (50,0) | 23 (37,7) | 24 (35,3) |
| of which AmpC | 5 (6,5) | 3 (10,0) | 1 (4,3) | 1 (4,2) |
| of which ESBL | 34 (44,2) | 16 (53,3) | 8 (34,8) | 10 (41,7) |
| of which KPC | 3 (3,9) | 2 (6,7) | 1 (4,3) | 0 (0) |
| of which NDM | 7 (9,1) | 3 (10,0) | 1 (4,3) | 3 (12,5) |
| of which VIM | 0 (0) | 0 (0) | 0 (0) | 0 (0) |
| of which OXA-48 | 0 (0) | 0 (0) | 0 (0) | 0 (0) |
| *P. aeruginosa* | 29 (15,3) | 12 (20,0) | 5 (8,2) | 12 (17,6) |
| of which DTR | 4 (13,8) | 2 (16,7) | 0 (0) | 2 (16,7) |
| of which VIM | 4 (13,8) | 0 (0) | 4 (80) | 0 (0) |
| *A. baumannii* | 8 (4,2) | 2 (3,3) | 4 (6,6) | 2 (2,9) |
| of which CRAB | 7 (87,5) | 1 (50,0) | 4 (100) | 2 (100) |
| Other Gram negative bacteria | 6 (3.2) | 1 (1.7) | 2 (3.3) | 3 (4.4) |
| *Candida* spp. | 13 (6.9) | 3 (5.0) | 8 (13.1) | 2 (2.9) |
| *Aspergillus spp.* | 1 (0.5) | 0 (0) | 0 (0) | 1 (1.5) |
| Other fungi | 0 (0) | 0 (0) | 0 (0) | 0 (0) |
| **Site of isolation (n), %** |  |  |  |  |
| Blood cultures | 134 (70,9) | 42 (70,0) | 40 (65,6) | 52 (76,5) |
| Urine cultures | 17 (9,0) | 9 (15,0) | 3 (4,9) | 5 (7,4) |
| Respiratory samples | 16 (8,5) | 2 (3,3) | 4 (6,6) | 10 (14,7) |
| Wound swabs | 2 (1,1) | 1 (1,7) | 0 (0) | 1 (1,5) |
| Others | 20 (10,6) | 6 (10,0) | 14 (23,0) | 0 (0) |

**(CRAB: carbapenem-resistant *Acinetobacter baumannii;* DTR: difficult-to-treat; ESBL: extended-spectrum beta-lactamase; KPC: *Klebsiella pneumoniae* carbapenemase; NDM: New Delhi metallo-beta-lactamase; VIM: Verona integron-encoded metallo-beta-lactamase; VRE: vancomycin-resistant enterococci).**

**Supplemental Table S3 – Antibiotic consumption data by department and by molecule between 2016 and 2024. Consumption is expressed by DDD/100 patient-days**

|  | **2016** | **2017** | **2018** | **2019** | **2020** | **2021** | **2022** | **2023** | **2024** |
| --- | --- | --- | --- | --- | --- | --- | --- | --- | --- |
| **Total consumption** | 341,36 | 398,51 | 361,48 | 414,85 | 489,66 | 661,52 | 706,81 | 591,39 | 960,87 |
| **By department** |  |  |  |  |  |  |  |  |  |
| Internal Medicine | 120,37 | 100,43 | 94,19 | 122,50 | 115,16 | 131,46 | 114,12 | 68,67 | 79,56 |
| General Surgery | 41,28 | 33,40 | 53,01 | 50,15 | 59,28 | 83,48 | 70,72 | 69,14 | 112,48 |
| Hematology | 179,71 | 264,68 | 214,28 | 242,20 | 315,22 | 446,57 | 521,96 | 453,58 | 768,83 |
| **By molecule** |  |  |  |  |  |  |  |  |  |
| Carbapenems | 341,36 | 398,51 | 360,75 | 408,00 | 487,32 | 625,85 | 650,27 | 563,86 | 825,24 |
| Meropenem/vaborbactam | 0,00 | 0,00 | 0,00 | 0,00 | 0,00 | 0,00 | 5,09 | 0,00 | 0,00 |
| Ceftolozane/tazobactam | 0,00 | 0,00 | 0,00 | 3,53 | 0,00 | 0,00 | 0,67 | 3,53 | 25,36 |
| Ceftazidime/avibactam | 0,00 | 0,00 | 0,74 | 3,32 | 2,35 | 31,84 | 30,81 | 13,79 | 72,27 |
| CAZAVI + aztreonam | 0,00 | 0,00 | 0,74 | 3,32 | 2,35 | 35,67 | 37,09 | 19,17 | 109,48 |
| Cefiderocol | 0,00 | 0,00 | 0,00 | 0,00 | 0,00 | 0,00 | 13,68 | 4,83 | 0,79 |

**(CAZAVI: ceftazidime/avibactam).**
